# Supplementary material for: Effect of pharmacological treatment on outcomes of heart failure with preserved ejection fraction: an updated systematic review and network meta-analysis of randomized controlled trials
Source: PubMed Central journal article supplement (PMC9644566; doi:10.1186/s12933-022-01679-2), 2022-11-08

# Confidence In Network Meta Analysis - CINeMA 2.0.0

## - Project: HFpEF network meta-analysis

### Incoherence

Define clinically important size of effect: Odds ratio

Relative effect estimates below **1.000** and above **1.000** are considered clinically important.

Importance of Incoherence depends on the variability of direct and indirect effects in relation to a clinically important size of effect

Global test based on a random-effects design-by-treatment interaction model

**$\chi^2$  statistic: 1.912 (2 degrees of freedom), P value: 0.384**

Local tests: Separating indirect from direct evidence

#### Comparison ACEI:ARB

Evidence: mixed

|                      |                            |
|----------------------|----------------------------|
| NMA odds ratio:      | <b>0.831(0.433,1.594)</b>  |
| Direct odds ratio:   | <b>0.443(0.018,11.167)</b> |
| Indirect odds ratio: | <b>0.853(0.439,1.659)</b>  |

#### Inconsistency measures

|                       |                            |
|-----------------------|----------------------------|
| Ratio of odds ratios: | <b>0.519(0.019,14.009)</b> |
| P value:              | <b>0.697</b>               |

Incoherence judgment

#### Comparison ACEI:Placebo

Evidence: mixed

|                      |                                     |
|----------------------|-------------------------------------|
| NMA odds ratio:      | <b>0.845(0.448,1.595)</b>           |
| Direct odds ratio:   | <b>0.835(0.442,1.577)</b>           |
| Indirect odds ratio: | <b>407.198(0.000,834213564.430)</b> |

#### Inconsistency measures

|                       |                              |
|-----------------------|------------------------------|
| Ratio of odds ratios: | <b>0.002(0.000,4261.174)</b> |
| P value:              | <b>0.404</b>                 |

Incoherence judgment

#### Comparison ARB:ARNI

Evidence: direct

|                    |                           |
|--------------------|---------------------------|
| Direct odds ratio: | <b>1.036(0.882,1.217)</b> |
|--------------------|---------------------------|

Inconsistency measures: Not applicable

Incoherence judgment

**Comparison** **ARB:Placebo**  
**Evidence: direct**  
 Direct odds ratio: **1.016(0.876,1.179)**  
**Inconsistency measures:** Not applicable  
 Incoherence judgment  ▼

**Comparison** **Beta blockers:Placebo**  
**Evidence: direct**  
 Direct odds ratio: **0.588(0.363,0.953)**  
**Inconsistency measures:** Not applicable  
 Incoherence judgment  ▼

**Comparison** **Digoxin:Placebo**  
**Evidence: direct**  
 Direct odds ratio: **0.999(0.744,1.342)**  
**Inconsistency measures:** Not applicable  
 Incoherence judgment  ▼

**Comparison** **MRA:Placebo**  
**Evidence: direct**  
 Direct odds ratio: **0.910(0.756,1.096)**  
**Inconsistency measures:** Not applicable  
 Incoherence judgment  ▼

**Comparison** **Placebo:SGLT-2**  
**Evidence: direct**  
 Direct odds ratio: **1.063(0.918,1.232)**  
**Inconsistency measures:** Not applicable  
 Incoherence judgment  ▼

**Comparison** **Placebo:Vericiguat 10mg**  
**Evidence: direct**  
 Direct odds ratio: **0.452(0.181,1.127)**  
**Inconsistency measures:** Not applicable  
 Incoherence judgment  ▼

**Comparison** **Placebo:Vericiguat 15mg**  
**Evidence: direct**  
 Direct odds ratio: **0.697(0.261,1.860)**  
**Inconsistency measures:** Not applicable  
 Incoherence judgment  ▼

**Comparison** **Vericiguat 10mg:Vericiguat 15mg**  
**Evidence: direct**  
 Direct odds ratio: **1.542(0.680,3.499)**  
**Inconsistency measures:** Not applicable  
 Incoherence judgment  ▼

**Comparison** **ACEI:ARNI**  
**Evidence: indirect**  
 Indirect odds ratio: **0.861(0.440,1.684)**  
**Inconsistency measures:** Not applicable  
 Incoherence judgment  ▼

**Comparison** **ACEI:Beta blockers**  
**Evidence: indirect**  
 Indirect odds ratio: **1.437(0.647,3.193)**  
**Inconsistency measures:** Not applicable  
 Incoherence judgment  ▼

**Comparison** **ACEI:Digoxin**  
**Evidence: indirect**  
 Indirect odds ratio: **0.846(0.420,1.703)**  
**Inconsistency measures:** Not applicable  
 Incoherence judgment  ▼

**Comparison** **ACEI:MRA**  
**Evidence: indirect**  
 Indirect odds ratio: **0.929(0.479,1.799)**  
**Inconsistency measures:** Not applicable  
 Incoherence judgment  ▼

**Comparison** **ACEI:SGLT-2**  
**Evidence: indirect**  
 Indirect odds ratio: **0.899(0.468,1.725)**  
**Inconsistency measures:** Not applicable  
 Incoherence judgment  ▼

**Comparison** **ACEI:Vericiguat 10mg**  
**Evidence: indirect**  
 Indirect odds ratio: **0.382(0.126,1.163)**  
**Inconsistency measures:** Not applicable  
 Incoherence judgment  ▼

**Comparison** **ACEI:Vericiguat 15mg**  
**Evidence: indirect**  
 Indirect odds ratio: **0.589(0.183,1.897)**  
**Inconsistency measures:** Not applicable  
 Incoherence judgment  ▼

**Comparison** **ARB:Beta blockers**  
**Evidence: indirect**  
 Indirect odds ratio: **1.731(1.044,2.869)**  
**Inconsistency measures:** Not applicable  
 Incoherence judgment  ▼

**Comparison** **ARB:Digoxin**  
**Evidence: indirect**  
 Indirect odds ratio: **1.018(0.732,1.416)**  
**Inconsistency measures:** Not applicable  
 Incoherence judgment  

**Comparison** **ARB:MRA**  
**Evidence: indirect**  
 Indirect odds ratio: **1.118(0.882,1.418)**  
**Inconsistency measures:** Not applicable  
 Incoherence judgment  

**Comparison** **ARB:SGLT-2**  
**Evidence: indirect**  
 Indirect odds ratio: **1.082(0.878,1.333)**  
**Inconsistency measures:** Not applicable  
 Incoherence judgment  

**Comparison** **ARB:Vericiguat 10mg**  
**Evidence: indirect**  
 Indirect odds ratio: **0.460(0.182,1.161)**  
**Inconsistency measures:** Not applicable  
 Incoherence judgment  

**Comparison** **ARB:Vericiguat 15mg**  
**Evidence: indirect**  
 Indirect odds ratio: **0.709(0.263,1.914)**  
**Inconsistency measures:** Not applicable  
 Incoherence judgment  

**Comparison** **ARNI:Beta blockers**  
**Evidence: indirect**  
 Indirect odds ratio: **1.670(0.983,2.840)**  
**Inconsistency measures:** Not applicable  
 Incoherence judgment  

**Comparison** **ARNI:Digoxin**  
**Evidence: indirect**  
 Indirect odds ratio: **0.983(0.681,1.419)**  
**Inconsistency measures:** Not applicable  
 Incoherence judgment  

**Comparison** **ARNI:MRA**  
**Evidence: indirect**  
 Indirect odds ratio: **1.079(0.810,1.438)**  
**Inconsistency measures:** Not applicable  
 Incoherence judgment  

**Comparison** **ARNI:Placebo**  
**Evidence: indirect**  
 Indirect odds ratio: **0.982(0.789,1.223)**  
**Inconsistency measures:** Not applicable  
 Incoherence judgment  

**Comparison** **ARNI:SGLT-2**  
**Evidence: indirect**  
 Indirect odds ratio: **1.044(0.802,1.359)**  
**Inconsistency measures:** Not applicable  
 Incoherence judgment  

**Comparison** **ARNI:Vericiguat 10mg**  
**Evidence: indirect**  
 Indirect odds ratio: **0.444(0.173,1.136)**  
**Inconsistency measures:** Not applicable  
 Incoherence judgment  

**Comparison** **ARNI:Vericiguat 15mg**  
**Evidence: indirect**  
 Indirect odds ratio: **0.685(0.251,1.872)**  
**Inconsistency measures:** Not applicable  
 Incoherence judgment  

**Comparison** **Beta blockers:Digoxin**  
**Evidence: indirect**  
 Indirect odds ratio: **0.588(0.334,1.036)**  
**Inconsistency measures:** Not applicable  
 Incoherence judgment  

**Comparison** **Beta blockers:MRA**  
**Evidence: indirect**  
 Indirect odds ratio: **0.646(0.385,1.084)**  
**Inconsistency measures:** Not applicable  
 Incoherence judgment  

**Comparison** **Beta blockers:SGLT-2**  
**Evidence: indirect**  
 Indirect odds ratio: **0.625(0.377,1.036)**  
**Inconsistency measures:** Not applicable  
 Incoherence judgment  

**Comparison** **Beta blockers:Vericiguat 10mg**  
**Evidence: indirect**  
 Indirect odds ratio: **0.266(0.095,0.747)**  
**Inconsistency measures:** Not applicable  
 Incoherence judgment  

**Comparison** **Beta blockers:Vericiguat 15mg**  
**Evidence: indirect**

Indirect odds ratio: **0.410(0.137,1.224)**

**Inconsistency measures:** Not applicable

Incoherence judgment  

**Comparison** **Digoxin:MRA**  
**Evidence: indirect**

Indirect odds ratio: **1.098(0.775,1.555)**

**Inconsistency measures:** Not applicable

Incoherence judgment  

**Comparison** **Digoxin:SGLT-2**  
**Evidence: indirect**

Indirect odds ratio: **1.062(0.764,1.477)**

**Inconsistency measures:** Not applicable

Incoherence judgment  

**Comparison** **Digoxin:Vericiguat 10mg**  
**Evidence: indirect**

Indirect odds ratio: **0.452(0.173,1.180)**

**Inconsistency measures:** Not applicable

Incoherence judgment  

**Comparison** **Digoxin:Vericiguat 15mg**  
**Evidence: indirect**

Indirect odds ratio: **0.697(0.250,1.941)**

**Inconsistency measures:** Not applicable

Incoherence judgment  

**Comparison** **MRA:SGLT-2**  
**Evidence: indirect**

Indirect odds ratio: **0.968(0.764,1.226)**

**Inconsistency measures:** Not applicable

Incoherence judgment  

**Comparison** **MRA:Vericiguat 10mg**  
**Evidence: indirect**

Indirect odds ratio: **0.411(0.162,1.046)**

**Inconsistency measures:** Not applicable

Incoherence judgment  

**Comparison** **MRA:Vericiguat 15mg**  
**Evidence: indirect**

Indirect odds ratio: **0.635(0.234,1.723)**

**Inconsistency measures:** Not applicable

Incoherence judgment  

**Comparison** **SGLT-2:Vericiguat 10mg****Evidence: indirect**Indirect odds ratio: **0.425(0.168,1.073)****Inconsistency measures:** Not applicableIncoherence judgment  **Comparison** **SGLT-2:Vericiguat 15mg****Evidence: indirect**Indirect odds ratio: **0.656(0.243,1.769)****Inconsistency measures:** Not applicableIncoherence judgment  

Supplement: 12933_2022_1679_MOESM5_ESM.pdf [file 12933_2022_1679_MOESM5_ESM.pdf]
