# Supplementary material for: Effect of pharmacological treatment on outcomes of heart failure with preserved ejection fraction: an updated systematic review and network meta-analysis of randomized controlled trials
Source: PubMed Central journal article supplement (PMC9644566; doi:10.1186/s12933-022-01679-2), 2022-11-08
Supplement: 12933_2022_1679_MOESM4_ESM.pdf [file 12933_2022_1679_MOESM4_ESM.pdf]

# Confidence In Network Meta Analysis - CINeMA 2.0.0 - Project: **HFpEF network meta-analysis**

## Indirectness

**13** total studies

**11** : low **2** : moderate

## Indirectness contributions

The bar chart shows the contributions of each study to the network estimate

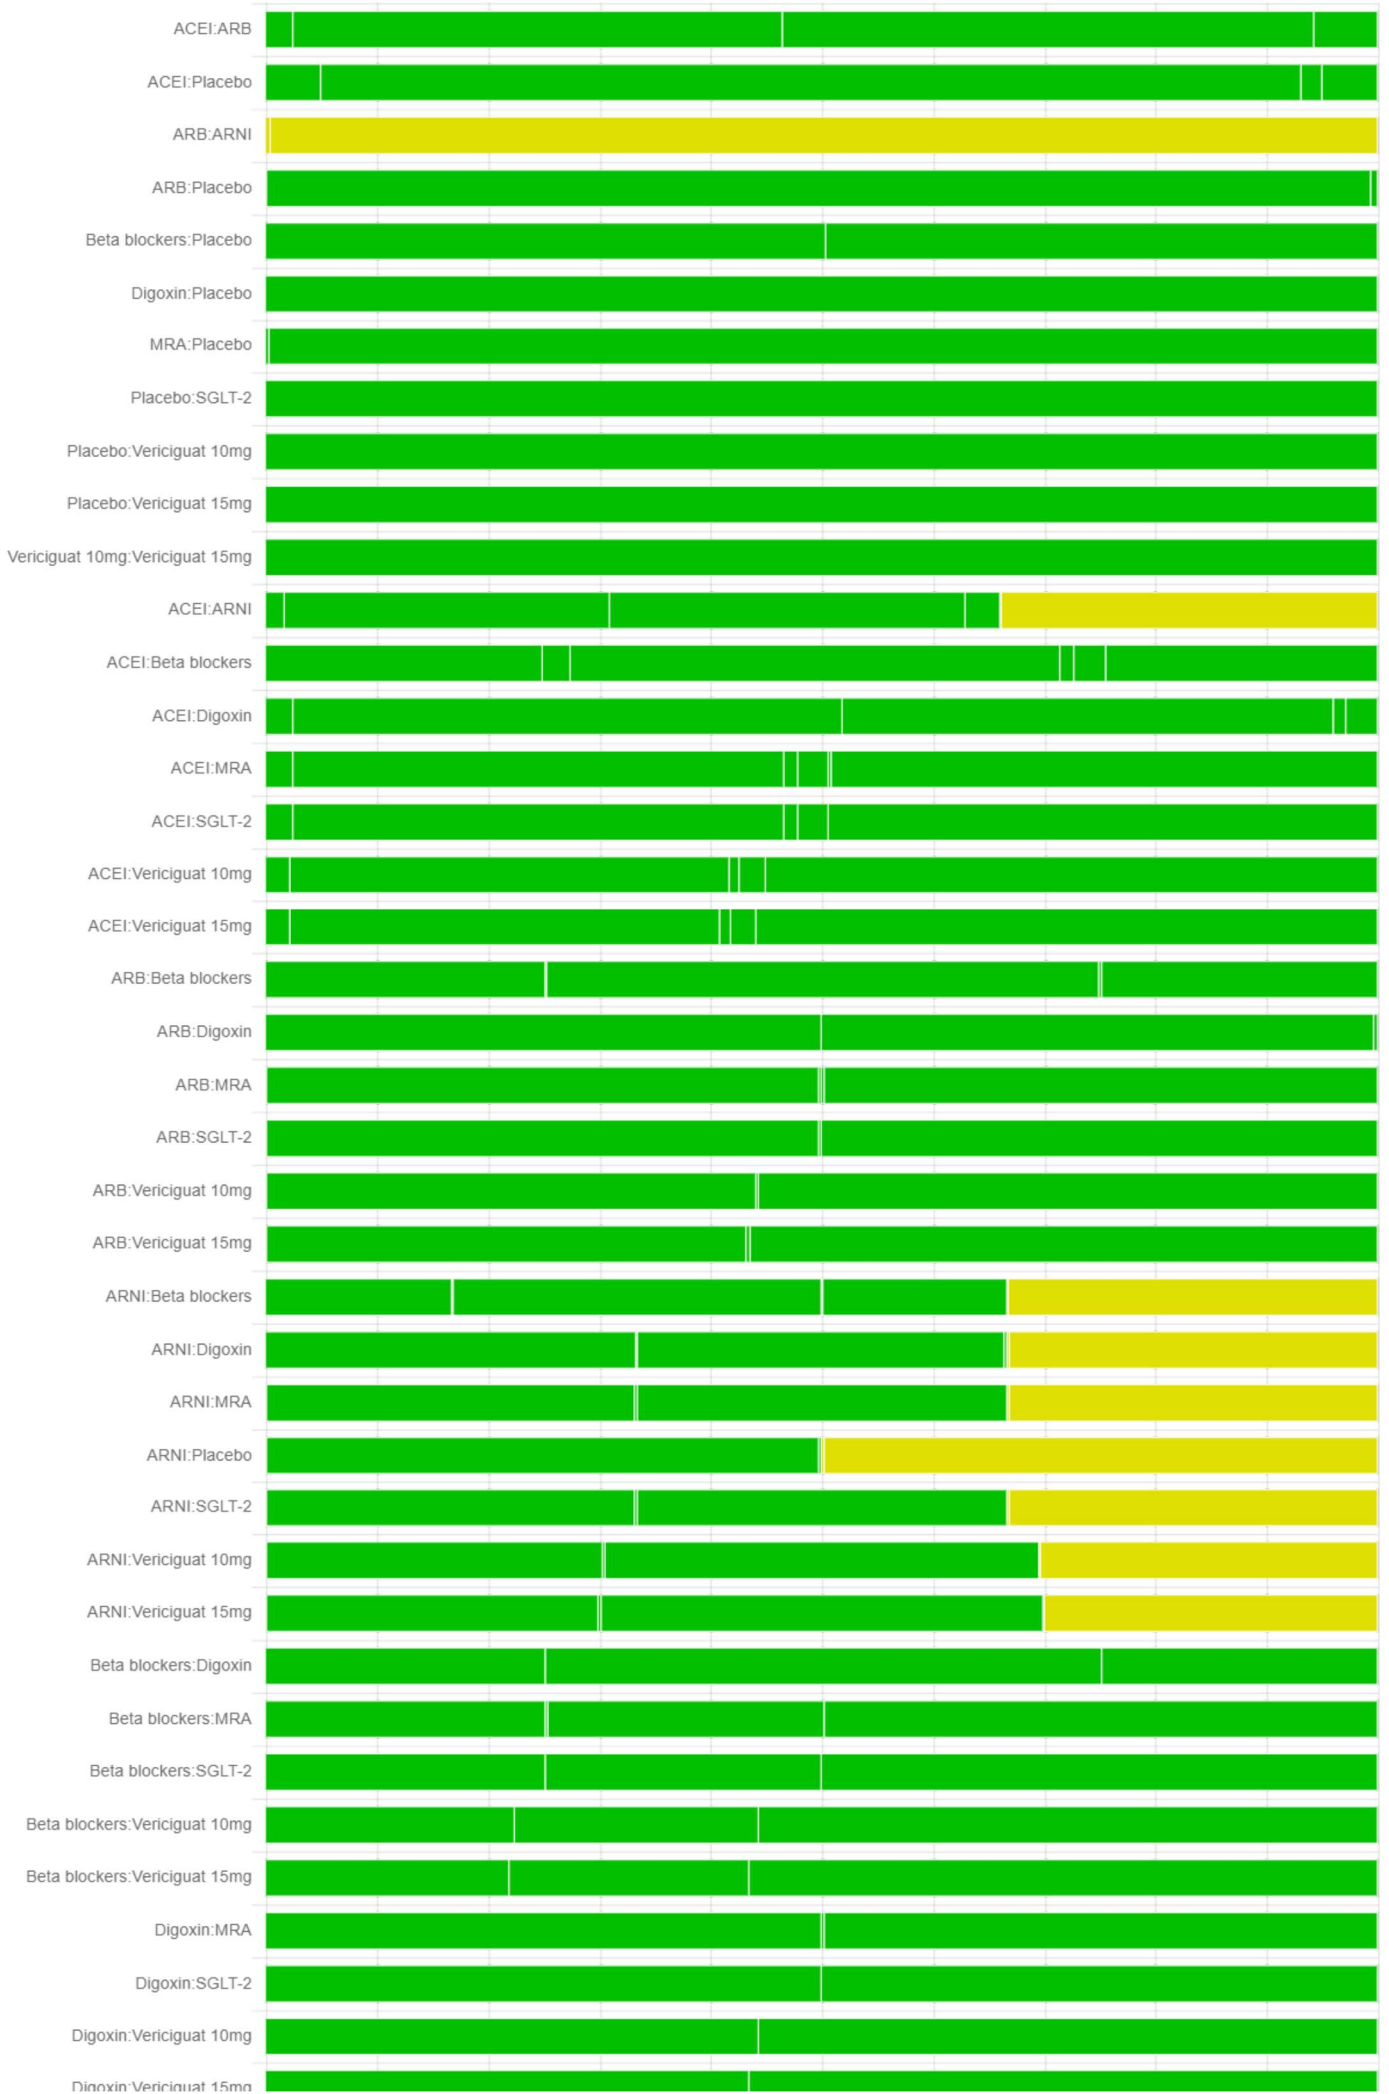

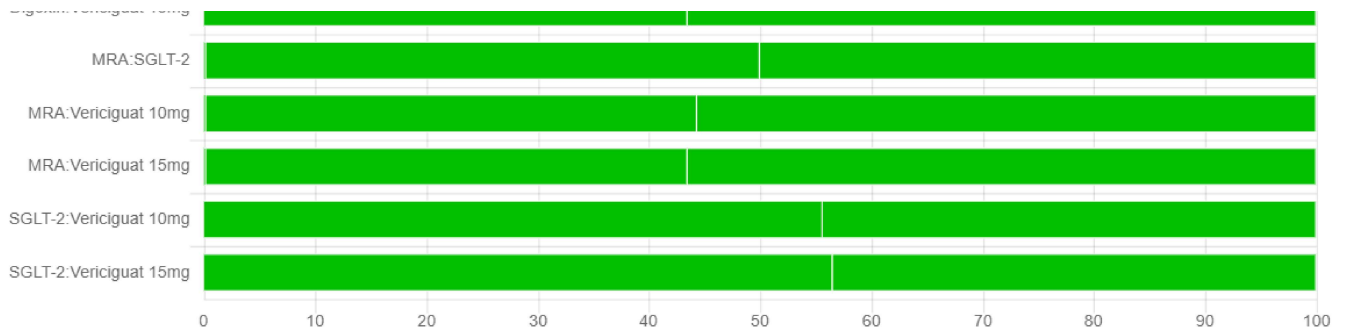

**Selected rule: Average**

**2 comparisons were manually updated**

**Comparison ACEI:ARB**  
**Evidence: mixed**  
 Majority: **No concerns**  
 Average: **No concerns**  
 Highest: **Some concerns**  
 NMA judgment

**Comparison ACEI:Placebo**  
**Evidence: mixed**  
 Majority: **No concerns**  
 Average: **No concerns**  
 Highest: **Some concerns**  
 NMA judgment

**Comparison ARB:ARNI**  
**Evidence: mixed**  
 Majority: **Some concerns**  
 Average: **Some concerns**  
 Highest: **Some concerns**  
 NMA judgment

**Comparison ARB:Placebo**  
**Evidence: mixed**  
 Majority: **No concerns**  
 Average: **No concerns**  
 Highest: **Some concerns**  
 NMA judgment

**Comparison Beta blockers:Placebo**  
**Evidence: mixed**  
 Majority: **No concerns**  
 Average: **No concerns**  
 Highest: **Some concerns**  
 NMA judgment

**Comparison Digoxin:Placebo**  
**Evidence: mixed**  
 Majority: **No concerns**  
 Average: **No concerns**  
 Highest: **Some concerns**  
 NMA judgment

**Comparison MRA:Placebo**  
**Evidence: mixed**  
 Majority: **No concerns**  
 Average: **No concerns**  
 Highest: **Some concerns**  
 NMA judgment

**Comparison Placebo:SGLT-2**  
**Evidence: mixed**  
 Majority: **No concerns**  
 Average: **No concerns**  
 Highest: **Some concerns**  
 NMA judgment

**Comparison Placebo:Vericiguat 10mg**  
**Evidence: mixed**  
 Majority: **No concerns**  
 Average: **No concerns**  
 Highest: **Some concerns**  
 NMA judgment

**Comparison Placebo:Vericiguat 15mg**  
**Evidence: mixed**  
 Majority: **No concerns**  
 Average: **No concerns**  
 Highest: **Some concerns**  
 NMA judgment

**Comparison****Vericiguat 10mg:Vericiguat 15mg****Evidence: mixed**

|           |                      |
|-----------|----------------------|
| Majority: | <b>No concerns</b>   |
| Average:  | <b>No concerns</b>   |
| Highest:  | <b>Some concerns</b> |

NMA judgment

No concerns ▾

**Comparison****ACEI:ARNI****Evidence: indirect**

|           |                      |
|-----------|----------------------|
| Majority: | <b>No concerns</b>   |
| Average:  | <b>No concerns</b>   |
| Highest:  | <b>Some concerns</b> |

NMA judgment

Major concerns ▾

**Comparison****Evidence: ACEI:Beta blockers indirect**

|           |                      |
|-----------|----------------------|
| Majority: | <b>No concerns</b>   |
| Average:  | <b>No concerns</b>   |
| Highest:  | <b>Some concerns</b> |

NMA judgment

No concerns ▾

**Comparison****ACEI:Digoxin****Evidence: indirect**

|           |                      |
|-----------|----------------------|
| Majority: | <b>No concerns</b>   |
| Average:  | <b>No concerns</b>   |
| Highest:  | <b>Some concerns</b> |

NMA judgment

No concerns ▾

**Comparison****ACEI:MRA****Evidence: indirect**

|           |                      |
|-----------|----------------------|
| Majority: | <b>No concerns</b>   |
| Average:  | <b>No concerns</b>   |
| Highest:  | <b>Some concerns</b> |

NMA judgment

No concerns ▾

**Comparison****ACEI:SGLT-2****Evidence: indirect**

|           |                      |
|-----------|----------------------|
| Majority: | <b>No concerns</b>   |
| Average:  | <b>No concerns</b>   |
| Highest:  | <b>Some concerns</b> |

NMA judgment

No concerns ▾

**Comparison****ACEI:Vericiguat 10mg****Evidence: indirect**

|           |                      |
|-----------|----------------------|
| Majority: | <b>No concerns</b>   |
| Average:  | <b>No concerns</b>   |
| Highest:  | <b>Some concerns</b> |

NMA judgment

No concerns ▾

**Comparison****ACEI:Vericiguat 15mg****Evidence: indirect**

|           |                      |
|-----------|----------------------|
| Majority: | <b>No concerns</b>   |
| Average:  | <b>No concerns</b>   |
| Highest:  | <b>Some concerns</b> |

NMA judgment

No concerns ▾

**Comparison****Evidence: ARB:Beta blockers indirect**

|           |                      |
|-----------|----------------------|
| Majority: | <b>No concerns</b>   |
| Average:  | <b>No concerns</b>   |
| Highest:  | <b>Some concerns</b> |

NMA judgment

No concerns ▾

**Comparison****ARB:Digoxin****Evidence: indirect**

|           |                      |
|-----------|----------------------|
| Majority: | <b>No concerns</b>   |
| Average:  | <b>No concerns</b>   |
| Highest:  | <b>Some concerns</b> |

NMA judgment

No concerns ▾

**Comparison****ARB:MRA****Evidence: indirect**

|           |                      |
|-----------|----------------------|
| Majority: | <b>No concerns</b>   |
| Average:  | <b>No concerns</b>   |
| Highest:  | <b>Some concerns</b> |

NMA judgment

No concerns ▾

**Comparison****ARB:SGLT-2****Evidence: indirect**

|           |                      |
|-----------|----------------------|
| Majority: | <b>No concerns</b>   |
| Average:  | <b>No concerns</b>   |
| Highest:  | <b>Some concerns</b> |

NMA judgment

No concerns ▾

**Comparison****ARB:Vericiguat 10mg****Evidence: indirect**Majority: **No concerns**Average: **No concerns**Highest: **Some concerns**

NMA judgment

No concerns ▾

**Comparison****ARB:Vericiguat 15mg****Evidence: indirect**Majority: **No concerns**Average: **No concerns**Highest: **Some concerns**

NMA judgment

No concerns ▾

**Comparison****Evidence: ARNI:Beta blockers indirect**Majority: **No concerns**Average: **No concerns**Highest: **Some concerns**

NMA judgment

No concerns ▾

**Comparison ARNI:Digoxin**Majority: **No concerns**Average: **No concerns**Highest: **Some concerns**

NMA judgment

No concerns ▾

**Comparison ARNI:MRA****Evidence: indirect**Majority: **No concerns**Average: **No concerns**Highest: **Some concerns**

NMA judgment

No concerns ▾

**Comparison ARNI:Placebo****Evidence: indirect**Majority: **No concerns**Average: **No concerns**Highest: **Some concerns**

NMA judgment

No concerns ▾

**Comparison ARNI:SGLT-2****Evidence: indirect**Majority: **No concerns**Average: **No concerns**Highest: **Some concerns**

NMA judgment

No concerns ▾

**Comparison ARNI:Vericiguat 10mg****Evidence: indirect**Majority: **No concerns**Average: **No concerns**Highest: **Some concerns**

NMA judgment

No concerns ▾

**Comparison****ARNI:Vericiguat 15mg****Evidence: indirect**Majority: **No concerns**Average: **No concerns**Highest: **Some concerns**

NMA judgment

No concerns ▾

**Comparison****Beta blockers:Digoxin****Evidence: indirect**Majority: **No concerns**Average: **No concerns**Highest: **Some concerns**

NMA judgment

No concerns ▾

**Comparison****Evidence: Beta blockers:MRA indirect**Majority: **No concerns**Average: **No concerns**Highest: **Some concerns**

NMA judgment

No concerns ▾

**Comparison****Beta blockers:SGLT-2****Evidence: indirect**Majority: **No concerns**Average: **No concerns**Highest: **Some concerns**

NMA judgment

No concerns ▾

**Comparison**  
**Beta blockers:Vericiguat**  
**10mg**

**Evidence: indirect**

Majority: **No concerns**  
Average: **No concerns**  
Highest: **Some concerns**

NMA judgment

No concerns ▾

**Comparison**  
**Beta blockers:Vericiguat**  
**15mg**

**Evidence: indirect**

Majority: **No concerns**  
Average: **No concerns**  
Highest: **Some concerns**

NMA judgment

No concerns ▾

**Comparison** **Digoxin:MRA**  
**Evidence: indirect**

Majority: **No concerns**  
Average: **No concerns**  
Highest: **Some concerns**

NMA judgment

No concerns ▾

**Comparison** **Digoxin:SGLT-2**  
**Evidence: indirect**

Majority: **No concerns**  
Average: **No concerns**  
Highest: **Some concerns**

NMA judgment

No concerns ▾

**Comparison**  
**Digoxin:Vericiguat 10mg**  
**Evidence: indirect**

Majority: **No concerns**  
Average: **No concerns**  
Highest: **Some concerns**

NMA judgment

No concerns ▾

**Comparison**  
**Digoxin:Vericiguat 15mg**  
**Evidence: indirect**

Majority: **No concerns**  
Average: **No concerns**  
Highest: **Some concerns**

NMA judgment

No concerns ▾

**Comparison** **MRA:SGLT-2**  
**Evidence: indirect**

Majority: **No concerns**  
Average: **No concerns**  
Highest: **Some concerns**

NMA judgment

No concerns ▾

**Comparison**  
**MRA:Vericiguat 10mg**  
**Evidence: indirect**

Majority: **No concerns**  
Average: **No concerns**  
Highest: **Some concerns**

NMA judgment

No concerns ▾

**Comparison**  
**MRA:Vericiguat 15mg**  
**Evidence: indirect**

Majority: **No concerns**  
Average: **No concerns**  
Highest: **Some concerns**

NMA judgment

No concerns ▾

**Comparison**  
**SGLT-2:Vericiguat 10mg**  
**Evidence: indirect**

Majority: **No concerns**  
Average: **No concerns**  
Highest: **Some concerns**

NMA judgment

No concerns ▾

**Comparison**  
**SGLT-2:Vericiguat 15mg**  
**Evidence: indirect**

Majority: **No concerns**  
Average: **No concerns**  
Highest: **Some concerns**

NMA judgment

No concerns ▾
