# Supplementary material for: Effect of pharmacological treatment on outcomes of heart failure with preserved ejection fraction: an updated systematic review and network meta-analysis of randomized controlled trials
Source: PubMed Central journal article supplement (PMC9644566; doi:10.1186/s12933-022-01679-2), 2022-11-08
Supplement: 12933_2022_1679_MOESM6_ESM.pdf [file 12933_2022_1679_MOESM6_ESM.pdf]

# Confidence In Network Meta Analysis - CINeMA 2.0.0 - Project: **HFpEF network meta-analysis**

## HFpEF network meta-analysis

| Comparison                      | Number of Studies | Within-study bias                       | Reporting bias                         | Indirectness                           | Imprecision                             | Heterogeneity                           | Incoherence                             | Confidence rating             | Reason(s) for downgrading |
|---------------------------------|-------------------|-----------------------------------------|----------------------------------------|----------------------------------------|-----------------------------------------|-----------------------------------------|-----------------------------------------|-------------------------------|---------------------------|
| Mixed evidence                  |                   |                                         |                                        |                                        |                                         |                                         |                                         |                               |                           |
| <b>ACEI vs ARB</b>              | 1                 | Major concerns <input type="checkbox"/> | Some concerns <input type="checkbox"/> | No concerns                            | Some concerns <input type="checkbox"/>  | No concerns                             | Some concerns <input type="checkbox"/>  | Moderate <input type="text"/> |                           |
| <b>ACEI vs Placebo</b>          | 3                 | Major concerns <input type="checkbox"/> | Some concerns <input type="checkbox"/> | No concerns                            | Major concerns <input type="checkbox"/> | No concerns                             | Some concerns <input type="checkbox"/>  | High <input type="text"/>     |                           |
| <b>ARB vs ARNI</b>              | 2                 | No concerns                             | Low risk                               | Some concerns <input type="checkbox"/> | Major concerns <input type="checkbox"/> | No concerns                             | No concerns                             | Low <input type="text"/>      |                           |
| <b>ARB vs Placebo</b>           | 2                 | No concerns                             | Low risk                               | No concerns                            | No concerns                             | No concerns                             | No concerns                             | Low <input type="text"/>      |                           |
| <b>Beta blockers vs Placebo</b> | 2                 | No concerns                             | Low risk                               | No concerns                            | No concerns                             | Major concerns <input type="checkbox"/> | No concerns                             | Low <input type="text"/>      |                           |
| <b>Digoxin vs Placebo</b>       | 1                 | Major concerns <input type="checkbox"/> | Low risk                               | No concerns                            | No concerns                             | No concerns                             | Major concerns <input type="checkbox"/> | High <input type="text"/>     |                           |

| Comparison                                | Number of Studies | Within-study bias                      | Reporting bias                         | Indirectness                            | Imprecision | Heterogeneity | Incoherence                            | Confidence rating                              | Reason(s) for downgrading |
|-------------------------------------------|-------------------|----------------------------------------|----------------------------------------|-----------------------------------------|-------------|---------------|----------------------------------------|------------------------------------------------|---------------------------|
| <b>MRA vs Placebo</b>                     | 2                 | No concerns                            | Low risk                               | No concerns                             | No concerns | No concerns   | No concerns                            | Low <input type="text" value="Low"/>           |                           |
| <b>Placebo vs SGLT-2</b>                  | 1                 | No concerns                            | Low risk                               | Major concerns <input type="checkbox"/> | No concerns | No concerns   | No concerns                            | Moderate <input type="text" value="Moderate"/> |                           |
| <b>Placebo vs Vericiguat 10mg</b>         | 1                 | Some concerns <input type="checkbox"/> | Low risk                               | No concerns                             | No concerns | No concerns   | No concerns                            | Low <input type="text" value="Low"/>           |                           |
| <b>Placebo vs Vericiguat 15mg</b>         | 1                 | Some concerns <input type="checkbox"/> | Low risk                               | No concerns                             | No concerns | No concerns   | No concerns                            | Low <input type="text" value="Low"/>           |                           |
| <b>Vericiguat 10mg vs Vericiguat 15mg</b> | 1                 | Some concerns <input type="checkbox"/> | Low risk                               | No concerns                             | No concerns | No concerns   | No concerns                            | Low <input type="text" value="Low"/>           |                           |
| Indirect evidence                         |                   |                                        |                                        |                                         |             |               |                                        |                                                |                           |
| <b>ACEI vs ARNI</b>                       | --                | No concerns                            | Some concerns <input type="checkbox"/> | Major concerns <input type="checkbox"/> | No concerns | No concerns   | No concerns                            | Moderate <input type="text" value="Moderate"/> |                           |
| <b>ACEI vs Beta blockers</b>              | --                | No concerns                            | Low risk                               | No concerns                             | No concerns | No concerns   | Some concerns <input type="checkbox"/> | Low <input type="text" value="Low"/>           |                           |
| <b>ACEI vs Digoxin</b>                    | --                | Some concerns <input type="checkbox"/> | Low risk                               | No concerns                             | No concerns | No concerns   | No concerns                            | Low <input type="text" value="Low"/>           |                           |

| Comparison                     | Number of Studies | Within-study bias                          | Reporting bias | Indirectness | Imprecision | Heterogeneity                              | Incoherence | Confidence rating                         | Reason(s) for downgrading |
|--------------------------------|-------------------|--------------------------------------------|----------------|--------------|-------------|--------------------------------------------|-------------|-------------------------------------------|---------------------------|
| <b>ACEI vs MRA</b>             | --                | No concerns                                | Low risk       | No concerns  | No concerns | No concerns                                | No concerns | Low <input type="button" value="v"/>      |                           |
| <b>ACEI vs SGLT-2</b>          | --                | No concerns                                | Low risk       | No concerns  | No concerns | No concerns                                | No concerns | Low <input type="button" value="v"/>      |                           |
| <b>ACEI vs Vericiguat 10mg</b> | --                | Some concerns<br><input type="checkbox"/>  | Low risk       | No concerns  | No concerns | No concerns                                | No concerns | Low <input type="button" value="v"/>      |                           |
| <b>ACEI vs Vericiguat 15mg</b> | --                | Some concerns<br><input type="checkbox"/>  | Low risk       | No concerns  | No concerns | No concerns                                | No concerns | Low <input type="button" value="v"/>      |                           |
| <b>ARB vs Beta blockers</b>    | --                | No concerns                                | Low risk       | No concerns  | No concerns | Major concerns<br><input type="checkbox"/> | No concerns | Moderate <input type="button" value="v"/> |                           |
| <b>ARB vs Digoxin</b>          | --                | Some concerns<br><input type="checkbox"/>  | Low risk       | No concerns  | No concerns | No concerns                                | No concerns | Low <input type="button" value="v"/>      |                           |
| <b>ARB vs MRA</b>              | --                | No concerns                                | Low risk       | No concerns  | No concerns | No concerns                                | No concerns | Low <input type="button" value="v"/>      |                           |
| <b>ARB vs SGLT-2</b>           | --                | No concerns                                | Low risk       | No concerns  | No concerns | No concerns                                | No concerns | Low <input type="button" value="v"/>      |                           |
| <b>ARB vs Vericiguat 10mg</b>  | --                | Major concerns<br><input type="checkbox"/> | Low risk       | No concerns  | No concerns | No concerns                                | No concerns | Moderate <input type="button" value="v"/> |                           |

| Comparison                     | Number of Studies | Within-study bias                          | Reporting bias                            | Indirectness | Imprecision | Heterogeneity | Incoherence | Confidence rating | Reason(s) for downgrading |
|--------------------------------|-------------------|--------------------------------------------|-------------------------------------------|--------------|-------------|---------------|-------------|-------------------|---------------------------|
| <b>ARB vs Vericiguat 15mg</b>  | --                | Major concerns<br><input type="checkbox"/> | Low risk                                  | No concerns  | No concerns | No concerns   | No concerns | Moderate ▾        |                           |
| <b>ARNI vs Beta blockers</b>   | --                | No concerns                                | Low risk                                  | No concerns  | No concerns | No concerns   | No concerns | Low ▾             |                           |
| <b>ARNI vs Digoxin</b>         | --                | Some concerns<br><input type="checkbox"/>  | Low risk                                  | No concerns  | No concerns | No concerns   | No concerns | Low ▾             |                           |
| <b>ARNI vs MRA</b>             | --                | No concerns                                | Low risk                                  | No concerns  | No concerns | No concerns   | No concerns | Low ▾             |                           |
| <b>ARNI vs Placebo</b>         | --                | No concerns                                | Low risk                                  | No concerns  | No concerns | No concerns   | No concerns | Low ▾             |                           |
| <b>ARNI vs SGLT-2</b>          | --                | No concerns                                | Some concerns<br><input type="checkbox"/> | No concerns  | No concerns | No concerns   | No concerns | Low ▾             |                           |
| <b>ARNI vs Vericiguat 10mg</b> | --                | No concerns                                | Low risk                                  | No concerns  | No concerns | No concerns   | No concerns | Low ▾             |                           |
| <b>ARNI vs Vericiguat 15mg</b> | --                | No concerns                                | Low risk                                  | No concerns  | No concerns | No concerns   | No concerns | Low ▾             |                           |

| Comparison                              | Number of Studies | Within-study bias                         | Reporting bias | Indirectness | Imprecision                             | Heterogeneity                           | Incoherence | Confidence rating                 | Reason(s) for downgrading |
|-----------------------------------------|-------------------|-------------------------------------------|----------------|--------------|-----------------------------------------|-----------------------------------------|-------------|-----------------------------------|---------------------------|
| <b>Beta blockers vs Digoxin</b>         | --                | Some concerns<br><input type="checkbox"/> | Low risk       | No concerns  | No concerns                             | No concerns                             | No concerns | Low <input type="checkbox"/>      |                           |
| <b>Beta blockers vs MRA</b>             | --                | No concerns                               | Low risk       | No concerns  | No concerns                             | No concerns                             | No concerns | Low <input type="checkbox"/>      |                           |
| <b>Beta blockers vs SGLT-2</b>          | --                | No concerns                               | Low risk       | No concerns  | Major concerns <input type="checkbox"/> | No concerns                             | No concerns | Moderate <input type="checkbox"/> |                           |
| <b>Beta blockers vs Vericiguat 10mg</b> | --                | Some concerns<br><input type="checkbox"/> | Low risk       | No concerns  | No concerns                             | Major concerns <input type="checkbox"/> | No concerns | Moderate <input type="checkbox"/> |                           |
| <b>Beta blockers vs Vericiguat 15mg</b> | --                | Some concerns<br><input type="checkbox"/> | Low risk       | No concerns  | No concerns                             | No concerns                             | No concerns | Low <input type="checkbox"/>      |                           |
| <b>Digoxin vs MRA</b>                   | --                | Some concerns<br><input type="checkbox"/> | Low risk       | No concerns  | No concerns                             | No concerns                             | No concerns | Low <input type="checkbox"/>      |                           |
| <b>Digoxin vs SGLT-2</b>                | --                | Some concerns<br><input type="checkbox"/> | Low risk       | No concerns  | No concerns                             | No concerns                             | No concerns | Low <input type="checkbox"/>      |                           |

| Comparison                        | Number of Studies | Within-study bias                         | Reporting bias | Indirectness | Imprecision | Heterogeneity | Incoherence | Confidence rating            | Reason(s) for downgrading |
|-----------------------------------|-------------------|-------------------------------------------|----------------|--------------|-------------|---------------|-------------|------------------------------|---------------------------|
| <b>Digoxin vs Vericiguat 10mg</b> | --                | Some concerns<br><input type="checkbox"/> | Low risk       | No concerns  | No concerns | No concerns   | No concerns | Low <input type="checkbox"/> |                           |
| <b>Digoxin vs Vericiguat 15mg</b> | --                | Some concerns<br><input type="checkbox"/> | Low risk       | No concerns  | No concerns | No concerns   | No concerns | Low <input type="checkbox"/> |                           |
| <b>MRA vs SGLT-2</b>              | --                | No concerns                               | Low risk       | No concerns  | No concerns | No concerns   | No concerns | Low <input type="checkbox"/> |                           |
| <b>MRA vs Vericiguat 10mg</b>     | --                | Some concerns<br><input type="checkbox"/> | Low risk       | No concerns  | No concerns | No concerns   | No concerns | Low <input type="checkbox"/> |                           |
| <b>MRA vs Vericiguat 15mg</b>     | --                | Some concerns<br><input type="checkbox"/> | Low risk       | No concerns  | No concerns | No concerns   | No concerns | Low <input type="checkbox"/> |                           |
| <b>SGLT-2 vs Vericiguat 10mg</b>  | --                | Some concerns<br><input type="checkbox"/> | Low risk       | No concerns  | No concerns | No concerns   | No concerns | Low <input type="checkbox"/> |                           |
| <b>SGLT-2 vs Vericiguat 15mg</b>  | --                | Some concerns<br><input type="checkbox"/> | Low risk       | No concerns  | No concerns | No concerns   | No concerns | Low <input type="checkbox"/> |                           |
